# Supplementary material for: Electronic excited states in deep variational Monte Carlo
Source: PubMed Central journal article supplement (PMC9845370; doi:10.1038/s41467-022-35534-5), 2023-01-17
Supplement: 41467_2022_35534_MOESM1_ESM.pdf [file 41467_2022_35534_MOESM1_ESM.pdf]

# Supplementary Information

## Electronic excited states in deep variational Monte Carlo

M. T. Entwistle<sup>1,\*</sup>, Z. Schätzle<sup>1,\*</sup>, P. A. Erdman<sup>1</sup>, J. Hermann<sup>1,†</sup> and F. Noé<sup>2,1,3,4,‡</sup>

<sup>1</sup>*FU Berlin, Department of Mathematics and Computer Science, Arnimallee 12, 14195 Berlin, Germany*

<sup>2</sup>*Microsoft Research AI4Science*

<sup>3</sup>*FU Berlin, Department of Physics, Arnimallee 14, 14195 Berlin, Germany*

<sup>4</sup>*Rice University, Department of Chemistry, Houston, Texas 77005, USA*

This document provides details on the test systems and our calculations as detailed in the main paper.

### SUPPLEMENTARY NOTE I: GEOMETRIES OF TEST SYSTEMS

All calculations presented in Sections II A – C of the main paper were done at the ground-state equilibrium geometries. The geometries for all molecules are listed in Supplementary Table I. For the ethylene structures presented in Section II D, we list the planar (ground-state equilibrium) and twisted ( $\tau = 90$ ) geometries.

Supplementary Table I: Ground-state equilibrium geometries of the test systems.

| Molecule                                | Atom | Position (Å)                      | Molecule                               | Atom | Position (Å)                     |
|-----------------------------------------|------|-----------------------------------|----------------------------------------|------|----------------------------------|
| LiH                                     | Li   | (0.000, 0.000, 0.000)             | BeH                                    | Be   | (0.000000, 0.000000, 0.000000)   |
|                                         | H    | (1.595, 0.000, 0.000)             |                                        | H    | (1.326903, 0.000000, 0.000000)   |
| BH                                      | B    | (0.000000, 0.000000, 0.000000)    | CH <sup>+</sup>                        | C    | (0.00000, 0.00000, 0.00000)      |
|                                         | H    | (0.000000, 0.000000, 1.222874)    |                                        | H    | (1.13092, 0.00000, 0.00000)      |
| H <sub>2</sub> O                        | O    | (0.000000, 0.000000, -0.069903)   | CO                                     | C    | (0.000000, 0.000000, -0.661165)  |
|                                         | H    | (0.000000, 0.757532, 0.518435)    |                                        | O    | (0.000000, 0.000000, 0.472379)   |
|                                         | H    | (0.000000, -0.757532, 0.518435)   |                                        |      |                                  |
| NH <sub>3</sub>                         | N    | (0.067759, -0.000000, 0.000000)   | C <sub>2</sub> H <sub>4</sub> (planar) | C    | (-0.675000, 0.000000, 0.000000)  |
|                                         | H    | (-0.313823, 0.468746, -0.811891)  |                                        | C    | (0.675000, 0.000000, 0.000000)   |
|                                         | H    | (-0.313823, -0.937491, -0.000000) |                                        | H    | (-1.242900, 0.000000, -0.930370) |
|                                         | H    | (-0.313823, 0.468746, 0.811891)   |                                        | H    | (-1.242900, 0.000000, 0.930370)  |
| C <sub>2</sub> H <sub>4</sub> (twisted) | C    | (-0.688500, 0.000000, 0.000000)   | C <sub>6</sub> H <sub>6</sub>          | C    | (0.000000, 1.396792, 0.000000)   |
|                                         |      | (0.688500, 0.000000, 0.000000)    |                                        | C    | (0.000000, -1.396792, 0.000000)  |
|                                         | H    | (-1.307207, 0.000000, -0.915547)  |                                        | C    | (1.209657, 0.698396, 0.000000)   |
|                                         | H    | (-1.307207, 0.000000, 0.915547)   |                                        | C    | (-1.209657, -0.698396, 0.000000) |
|                                         | H    | (1.307207, -0.915547, 0.000000)   |                                        | C    | (-1.209657, 0.698396, 0.000000)  |
|                                         | H    | (1.307207, 0.915547, 0.000000)    |                                        | C    | (1.209657, -0.698396, 0.000000)  |
|                                         |      |                                   |                                        | H    | (0.000000, 2.484212, 0.000000)   |
|                                         |      |                                   |                                        | H    | (2.151390, 1.242106, 0.000000)   |
|                                         |      |                                   |                                        | H    | (-2.151390, -1.242106, 0.000000) |
|                                         |      |                                   |                                        | H    | (-2.151390, 1.242106, 0.000000)  |
|                                         |      | H                                 | (2.151390, -1.242106, 0.000000)        |      |                                  |
|                                         |      | H                                 | (0.000000, -2.484212, 0.000000)        |      |                                  |

\* M. T. Entwistle and Z. Schätzle contributed equally to this work.

† science@jan.hermann.name

‡ franknoe@microsoft.com

**SUPPLEMENTARY NOTE II: ENERGIES FOR SMALL ATOMS AND MOLECULES**

We tabulate the total energies and vertical excitation energies that were obtained for the small systems, as presented in Section II A of the main paper. These are listed in Supplementary Table II.

Supplementary Table II: Total energies and vertical excitation energies (both in Ha) for the small atoms in Section II A.

| System | $E_n$        | Correlation energy (%) | $\Delta E$ | $\Delta E$ ( $\sigma^2$ matching) |
|--------|--------------|------------------------|------------|-----------------------------------|
| Li     | -7.47800(4)  | 99.9(1) <sup>a</sup>   | —          | —                                 |
|        | -7.40998(5)  | —                      | 0.06801(7) | 0.06807(7)                        |
|        | -7.40988(7)  | —                      | 0.06812(8) | 0.06811(9)                        |
|        | -7.40977(7)  | —                      | 0.06823(8) | 0.06824(9)                        |
|        | -7.335(4)    | —                      | 0.143(4)   | 0.143(4)                          |
| Be     | -14.66736(7) | 100.0(1) <sup>a</sup>  | —          | —                                 |
|        | -14.5663(6)  | —                      | 0.1011(6)  | 0.1009(6)                         |
|        | -14.5664(1)  | —                      | 0.1010(1)  | 0.1007(2)                         |
|        | -14.5664(1)  | —                      | 0.1010(1)  | 0.1004(2)                         |
|        | -14.4710(2)  | —                      | 0.1964(2)  | 0.1952(2)                         |
| B      | -24.6509(2)  | 97.6(1) <sup>a</sup>   | —          | —                                 |
|        | -24.6506(2)  | —                      | 0.0004(3)  | 0.0005(3)                         |
|        | -24.6498(2)  | —                      | 0.0011(3)  | 0.0008(3)                         |
|        | -24.5206(2)  | —                      | 0.1303(2)  | 0.1300(3)                         |
|        | -24.5202(2)  | —                      | 0.1307(3)  | 0.1300(3)                         |
| C      | -37.8388(3)  | 96.0(2) <sup>a</sup>   | —          | —                                 |
|        | -37.8388(2)  | —                      | -0.0001(4) | 0.0001(4)                         |
|        | -37.8378(2)  | —                      | 0.0010(4)  | 0.0008(4)                         |
|        | -37.7918(2)  | —                      | 0.0470(4)  | 0.0470(4)                         |
|        | -37.7911(3)  | —                      | 0.0477(4)  | 0.0451(4)                         |
| N      | -54.5836(3)  | 97.0(2) <sup>a</sup>   | —          | —                                 |
|        | -54.4911(4)  | —                      | 0.0925(5)  | 0.0900(5)                         |
|        | -54.4885(4)  | —                      | 0.0952(5)  | 0.0893(6)                         |
|        | -54.4874(4)  | —                      | 0.0963(6)  | 0.0883(6)                         |
|        | -54.4861(4)  | —                      | 0.0975(5)  | 0.0918(6)                         |
| O      | -75.0532(5)  | 94.6(2) <sup>a</sup>   | —          | —                                 |
|        | -75.0506(5)  | —                      | 0.0027(7)  | -0.0003(8)                        |
|        | -75.0519(5)  | —                      | 0.0013(7)  | -0.0011(7)                        |
|        | -74.9763(6)  | —                      | 0.0769(8)  | 0.0711(8)                         |
|        | -74.9771(6)  | —                      | 0.0761(8)  | 0.0703(9)                         |

<sup>a</sup> Exact energy and HF energy at the CBS limit [1]

Supplementary Table II (continued): Total energies and vertical excitation energies (both in Ha) for the many-state calculations in Section II A.

| System | $E_n$       | Correlation energy (%) | $\Delta E$ | $\Delta E$ ( $\sigma^2$ matching) |
|--------|-------------|------------------------|------------|-----------------------------------|
| LiH    | -8.0695(1)  | 98.9(1) <sup>a</sup>   | —          | —                                 |
|        | -7.9497(1)  | —                      | 0.1198(1)  | 0.1199(1)                         |
|        | -7.9348(1)  | —                      | 0.1348(2)  | 0.1347(2)                         |
|        | -7.9112(1)  | —                      | 0.1584(2)  | 0.1573(2)                         |
|        | -7.9114(1)  | —                      | 0.1582(1)  | 0.1574(2)                         |
|        | -7.8978(1)  | —                      | 0.1717(2)  | 0.1710(2)                         |
|        | -7.8977(1)  | —                      | 0.1718(2)  | 0.1709(2)                         |
|        | -7.8549(1)  | —                      | 0.2147(2)  | 0.2130(2)                         |
| BeH    | -15.2452(4) | 98.3(4) <sup>a</sup>   | —          | —                                 |
|        | -15.1516(2) | —                      | 0.0936(4)  | 0.0916(3)                         |
|        | -15.1507(2) | —                      | 0.0946(5)  | 0.0914(3)                         |
|        | -15.0286(3) | —                      | 0.2166(5)  | 0.2132(4)                         |
|        | -15.0259(2) | —                      | 0.2193(5)  | 0.2156(4)                         |
|        | -15.0249(2) | —                      | 0.2203(5)  | 0.2138(17)                        |
|        | -14.9951(4) | —                      | 0.2500(5)  | 0.2379(5)                         |
|        | -14.9528(3) | —                      | 0.2923(5)  | 0.2793(16)                        |
| Be     | -14.6667(1) | 99.3(1) <sup>a</sup>   | —          | —                                 |
|        | -14.5655(2) | —                      | 0.1012(2)  | 0.1011(2)                         |
|        | -14.5654(1) | —                      | 0.1013(2)  | 0.1007(2)                         |
|        | -14.5651(2) | —                      | 0.1016(2)  | 0.1009(3)                         |
|        | -14.4663(3) | —                      | 0.2004(4)  | 0.1967(10)                        |
|        | -14.4671(3) | —                      | 0.1996(3)  | 0.1976(5)                         |
|        | -14.4665(3) | —                      | 0.2002(3)  | 0.1982(5)                         |
|        | -14.3915(2) | —                      | 0.2752(2)  | 0.2732(4)                         |

<sup>a</sup> Exact energy and HF energy at the CBS limit [1]

**SUPPLEMENTARY NOTE III: ENERGIES AND OSCILLATOR STRENGTHS FOR INTERMEDIATE SYSTEMS**

We tabulate the total energies, vertical excitation energies and oscillator strengths that were obtained for the intermediate systems, as presented in Section II B of the main paper. These are listed in Supplementary Table III.

Supplementary Table III: Total energies (in Ha), vertical excitation energies (in Ha) and oscillator strengths (in au) for the systems in Section II B.

| Molecule         | $E_n$        | Correlation energy (%) | $\Delta E$ | $\Delta E$ ( $\sigma^2$ matching) | $f$        | $f$ ( $\sigma^2$ matching) |
|------------------|--------------|------------------------|------------|-----------------------------------|------------|----------------------------|
| BH               | -25.2883(2)  | 99.5(1) <sup>a</sup>   | —          | —                                 | —          | —                          |
|                  | -25.2361(2)  | —                      | 0.0522(3)  | 0.0511(3)                         | —          | —                          |
|                  | -25.2356(2)  | —                      | 0.0527(3)  | 0.0503(3)                         | —          | —                          |
|                  | -25.1765(2)  | —                      | 0.1118(3)  | 0.1088(3)                         | 0.0276(1)  | 0.0253(1)                  |
| CH <sup>+</sup>  | -38.0863(2)  | —                      | —          | —                                 | —          | —                          |
|                  | -38.0385(2)  | —                      | 0.0478(3)  | 0.0460(3)                         | —          | —                          |
|                  | -38.0375(3)  | —                      | 0.0488(4)  | 0.0465(4)                         | —          | —                          |
|                  | -37.9664(3)  | —                      | 0.1199(4)  | 0.1172(4)                         | 0.00606(4) | 0.00576(3)                 |
| H <sub>2</sub> O | -76.4230(5)  | 95.9(1) <sup>b</sup>   | —          | —                                 | —          | —                          |
|                  | -76.1499(6)  | —                      | 0.2731(8)  | 0.2702(8)                         | —          | —                          |
|                  | -76.1343(6)  | —                      | 0.2887(8)  | 0.2845(9)                         | 0.0395(3)  | 0.0374(3)                  |
| NH <sub>3</sub>  | -56.5533(3)  | 96.6(1) <sup>b</sup>   | —          | —                                 | —          | —                          |
|                  | -56.3122(4)  | —                      | 0.2411(5)  | 0.2391(6)                         | —          | —                          |
|                  | -56.2972(4)  | —                      | 0.2561(5)  | 0.2531(6)                         | 0.0630(4)  | 0.0731(5)                  |
| CO               | -113.3039(6) | 95.9(1) <sup>b</sup>   | —          | —                                 | —          | —                          |
|                  | -113.0618(7) | —                      | 0.2421(9)  | 0.2386(9)                         | —          | —                          |
|                  | -112.9765(7) | —                      | 0.3274(9)  | 0.3211(9)                         | 0.1048(5)  | 0.1030(5)                  |

<sup>a</sup> Exact energy [2] and HF energy at the CBS limit [3]

<sup>b</sup> Exact energy and HF energy at the CBS limit [1]

**SUPPLEMENTARY NOTE IV: ENERGIES FOR BENZENE**

We tabulate the total energies and vertical excitation energies that were obtained for benzene, as presented in Section II C of the main paper. These are listed in Supplementary Table IV.

Supplementary Table IV: Total energies and vertical excitation energies (both in Ha) for benzene in Section II C.

| $E_0$         | $E_1$        | $\Delta E$ | $\Delta E$ ( $\sigma^2$ matching) |
|---------------|--------------|------------|-----------------------------------|
| -232.0675(11) | -231.8628(9) | 0.2047(14) | 0.1637(13)                        |

**SUPPLEMENTARY NOTE V: ENERGIES FOR ETHYLENE**

We tabulate the total energies and vertical excitation energies that were obtained for all ethylene structures, as presented in Section II D of the main paper. These are listed in Supplementary Table V.

Supplementary Table V: Total energies and vertical excitation energies (both in Ha) for ethylene in Section II D.

| $\tau$ ( $\phi = 0$ ) | $E_n$       | $\Delta E$ | $\Delta E$ ( $\sigma^2$ matching) | $\phi$ ( $\tau = 90^\circ$ ) | $E_n$       | $\Delta E$ | $\Delta E$ ( $\sigma^2$ matching) |
|-----------------------|-------------|------------|-----------------------------------|------------------------------|-------------|------------|-----------------------------------|
| 0                     | -78.5650(4) | —          | —                                 | 0                            | -78.4477(4) | —          | —                                 |
|                       | -78.2617(5) | 0.3033(6)  | 0.2964(7)                         |                              | -78.3578(5) | 0.0899(6)  | 0.0897(7)                         |
| 15                    | -78.5609(4) | —          | —                                 | 20                           | -78.4471(4) | —          | —                                 |
|                       | -78.2755(5) | 0.2854(6)  | 0.2799(7)                         |                              | -78.3589(5) | 0.0882(6)  | 0.0869(7)                         |
| 30                    | -78.5461(4) | —          | —                                 | 40                           | -78.4391(4) | —          | —                                 |
|                       | -78.2925(5) | 0.2536(6)  | 0.2459(7)                         |                              | -78.3661(5) | 0.0730(6)  | 0.0735(6)                         |
| 45                    | -78.5254(4) | —          | —                                 | 60                           | -78.4267(5) | —          | —                                 |
|                       | -78.3171(5) | 0.2083(6)  | 0.2032(7)                         |                              | -78.3704(5) | 0.0563(7)  | 0.0537(7)                         |
| 60                    | -78.4952(4) | —          | —                                 | 70                           | -78.4161(5) | —          | —                                 |
|                       | -78.3339(5) | 0.1613(6)  | 0.1580(7)                         |                              | -78.3721(5) | 0.0440(7)  | 0.0428(7)                         |
| 70                    | -78.4771(4) | —          | —                                 | 80                           | -78.3992(4) | —          | —                                 |
|                       | -78.3416(5) | 0.1355(6)  | 0.1324(7)                         |                              | -78.3701(5) | 0.0291(6)  | 0.0258(7)                         |
| 80                    | -78.4540(5) | —          | —                                 | 90                           | -78.3828(4) | —          | —                                 |
|                       | -78.3449(5) | 0.1091(7)  | 0.1089(7)                         |                              | -78.3675(5) | 0.0153(6)  | 0.0112(7)                         |
| 85                    | -78.4483(4) | —          | —                                 | 95                           | -78.3697(4) | —          | —                                 |
|                       | -78.3512(5) | 0.0971(6)  | 0.0922(7)                         |                              | -78.3612(5) | 0.0085(6)  | 0.0083(7)                         |
| 90                    | -78.4425(5) | —          | —                                 | 97.5                         | -78.3634(5) | —          | —                                 |
|                       | -78.3531(5) | 0.0894(7)  | 0.0881(7)                         |                              | -78.3593(5) | 0.0041(7)  | 0.0023(7)                         |
|                       |             |            |                                   | 100                          | -78.3587(5) | —          | —                                 |
|                       |             |            |                                   |                              | -78.3559(5) | 0.0028(7)  | 0.0014(7)                         |
|                       |             |            |                                   | 102.5                        | -78.3552(5) | —          | —                                 |
|                       |             |            |                                   |                              | -78.3529(5) | 0.0023(7)  | 0.0042(7)                         |
|                       |             |            |                                   | 105                          | -78.3509(5) | —          | —                                 |
|                       |             |            |                                   |                              | -78.3448(5) | 0.0061(7)  | 0.0048(7)                         |
|                       |             |            |                                   | 110                          | -78.3449(5) | —          | —                                 |
|                       |             |            |                                   |                              | -78.3224(5) | 0.0225(7)  | 0.0189(7)                         |
|                       |             |            |                                   | 120                          | -78.3284(5) | —          | —                                 |
|                       |             |            |                                   |                              | -78.2929(5) | 0.0355(7)  | 0.0231(7)                         |

**SUPPLEMENTARY NOTE VI: OVERLAPS OF TRAINED WAVEFUNCTIONS**

For each system we compute the pairwise overlaps between all trained wavefunctions and tabulate the mean. These are listed in Supplementary Table VI.

Supplementary Table VI: Mean pairwise overlaps for all systems.

| System           | $\overline{ S_{ij} }$ | System                                        | $\overline{ S_{ij} }$ | System                                        | $\overline{ S_{ij} }$ | System                                           | $\overline{ S_{ij} }$ |
|------------------|-----------------------|-----------------------------------------------|-----------------------|-----------------------------------------------|-----------------------|--------------------------------------------------|-----------------------|
| Li               | 0.0010(6)             | CH <sup>+</sup>                               | 0.0018(7)             | C <sub>2</sub> H <sub>4</sub> ( $\tau = 80$ ) | 0.002(2)              | C <sub>2</sub> H <sub>4</sub> ( $\phi = 95$ )    | 0.002(1)              |
| Be               | 0.004(1)              | H <sub>2</sub> O                              | 0.007(3)              | C <sub>2</sub> H <sub>4</sub> ( $\tau = 85$ ) | 0.001(1)              | C <sub>2</sub> H <sub>4</sub> ( $\phi = 97.5$ )  | 0.003(2)              |
| B                | 0.0023(9)             | NH <sub>3</sub>                               | 0.014(3)              | C <sub>2</sub> H <sub>4</sub> ( $\tau = 90$ ) | 0.008(2)              | C <sub>2</sub> H <sub>4</sub> ( $\phi = 100$ )   | 0.002(3)              |
| C                | 0.0030(4)             | CO                                            | 0.003(1)              | C <sub>2</sub> H <sub>4</sub> ( $\phi = 0$ )  | 0.009(1)              | C <sub>2</sub> H <sub>4</sub> ( $\phi = 102.5$ ) | 0.007(1)              |
| N                | 0.0040(5)             | C <sub>2</sub> H <sub>4</sub> ( $\tau = 0$ )  | 0.011(3)              | C <sub>2</sub> H <sub>4</sub> ( $\phi = 20$ ) | 0.002(2)              | C <sub>2</sub> H <sub>4</sub> ( $\phi = 105$ )   | 0.007(2)              |
| O                | 0.0035(4)             | C <sub>2</sub> H <sub>4</sub> ( $\tau = 15$ ) | 0.007(3)              | C <sub>2</sub> H <sub>4</sub> ( $\phi = 40$ ) | 0.003(2)              | C <sub>2</sub> H <sub>4</sub> ( $\phi = 110$ )   | 0.009(1)              |
| LiH              | 0.0047(9)             | C <sub>2</sub> H <sub>4</sub> ( $\tau = 30$ ) | 0.004(3)              | C <sub>2</sub> H <sub>4</sub> ( $\phi = 60$ ) | 0.001(1)              | C <sub>2</sub> H <sub>4</sub> ( $\phi = 120$ )   | 0.002(3)              |
| BeH              | 0.0068(5)             | C <sub>2</sub> H <sub>4</sub> ( $\tau = 45$ ) | 0.003(2)              | C <sub>2</sub> H <sub>4</sub> ( $\phi = 70$ ) | 0.002(2)              | C <sub>6</sub> H <sub>6</sub>                    | 0.001(4)              |
| Be (many states) | 0.0035(5)             | C <sub>2</sub> H <sub>4</sub> ( $\tau = 60$ ) | 0.008(2)              | C <sub>2</sub> H <sub>4</sub> ( $\phi = 80$ ) | 0.002(3)              |                                                  |                       |
| BH               | 0.0033(9)             | C <sub>2</sub> H <sub>4</sub> ( $\tau = 70$ ) | 0.002(2)              | C <sub>2</sub> H <sub>4</sub> ( $\phi = 90$ ) | 0.006(2)              |                                                  |                       |

**SUPPLEMENTARY NOTE VII: HYPERPARAMETERS**

We tabulate the hyperparameters that were used in all calculations. These are listed in Supplementary Table VII. We also tabulate the active spaces and spin configurations ( $S^2$ ,  $M = (N_\uparrow - N_\downarrow)/2$  (eigenvalue of  $S_z$ )) used to generate the CASSCF baselines. These are listed in Supplementary Table VIII.

Supplementary Table VII: Hyperparameters used in calculations. (See Ref. [4] for more details.)

| Hyperparameter                                  | Value      | Hyperparameter                                    | Value        |
|-------------------------------------------------|------------|---------------------------------------------------|--------------|
| One-electron basis                              | 6-311G     | Maximum number of determinants                    | 10           |
| Dimension of $\mathbf{e}$ (# distance features) | 32         | Dimension of $\mathbf{x}_i$ (embedding dimension) | 128          |
| Dimension of $\mathbf{z}_i$ (kernel dimension)  | 64         | Number of layers in $\mathbf{w}_\theta$           | 1            |
| Number of layers in $\mathbf{h}_\theta$         | 2          | Number of layers in $\mathbf{g}_\theta$           | 2            |
| Number of interaction layers L:                 |            | Number of layers in $\eta_\theta$ :               |              |
| small/intermediate systems & ethylene           | 4          | small/intermediate systems & ethylene             | 3            |
| benzene                                         | 5          | benzene                                           | 5            |
| Number of layers in $\kappa_\theta$ :           |            | Number of walkers:                                |              |
| small/intermediate systems & ethylene           | 3          | small/intermediate systems & ethylene             | 1000         |
| benzene                                         | 5          | benzene                                           | 400          |
| Batch size                                      | 2000       | Number of equilibration steps                     | 500          |
| Number of training steps:                       |            | Optimizer                                         | AdamW        |
| small systems                                   | 5000/10000 | Learning rate scheduler                           | CyclicLR     |
| intermediate systems                            | 20000      | Minimum/maximum learning rate:                    |              |
| ethylene                                        | 10000      | small/intermediate systems & ethylene             | 0.0001/0.005 |
| benzene                                         | 10000      | benzene                                           | 0.0001/0.001 |
| Cyclic frequency                                | 1000       | Clipping window q                                 | 5            |
| Minimum/maximum $\alpha$                        | 0.25/1.0   | Epoch size                                        | 10           |
| Resampling frequency                            | 3          | Number of decorrelation sampling steps:           |              |
| Target acceptance                               | 57%        | small/intermediate systems & ethylene             | 5            |
|                                                 |            | benzene                                           | 15           |

Supplementary Table VIII: The active spaces, specifying  $N$  electrons across  $P$  orbitals, and spin configurations, used to generate the CASSCF baselines for all systems.

| System | CAS( $P, N$ ) | Spin( $S^2, M$ )                                                                                           | System                        | CAS( $P, N$ ) | Spin( $S^2, M$ )     |
|--------|---------------|------------------------------------------------------------------------------------------------------------|-------------------------------|---------------|----------------------|
| Li     | (5, 3)        | ( $\frac{3}{4}/\frac{3}{4}/\frac{3}{4}/\frac{3}{4}/\frac{3}{4}, 1$ )                                       | Be (many states)              | (6, 4)        | (0/2/2/2/0/0/0/2, 1) |
| Be     | (5, 4)        | (0/2/2/2/0, 0)                                                                                             | BH                            | (5, 2)        | (0/2/2/0, 0)         |
| B      | (5, 5)        | ( $\frac{3}{4}/\frac{3}{4}/\frac{3}{4}/\frac{15}{4}/\frac{15}{4}, 1$ )                                     | CH <sup>+</sup>               | (5, 2)        | (0/2/2/0, 0)         |
| C      | (5, 6)        | (2/2/2/0/0, 0)                                                                                             | H <sub>2</sub> O              | (5, 2)        | (0/2/0, 0)           |
| N      | (5, 7)        | ( $\frac{15}{4}/\frac{3}{4}/\frac{3}{4}/\frac{3}{4}/\frac{3}{4}, 1$ )                                      | NH <sub>3</sub>               | (7, 2)        | (0/2/0, 0)           |
| O      | (5, 8)        | (2/2/2/0/0, 0)                                                                                             | CO                            | (10, 10)      | (0/2/0, 0)           |
| LiH    | (12, 4)       | (0/2/0/2/2/0/0/2, 0)                                                                                       | C <sub>2</sub> H <sub>4</sub> | (4, 4)        | (0/0, 0)             |
| BeH    | (12, 5)       | ( $\frac{3}{4}/\frac{3}{4}/\frac{3}{4}/\frac{3}{4}/\frac{15}{4}/\frac{15}{4}/\frac{3}{4}/\frac{3}{4}, 1$ ) | C <sub>6</sub> H <sub>6</sub> | (4, 4)        | (0/2, 0)             |

**Supplementary References**

[1] D. P. O’Neill and P. M. W. G. \*, Benchmark correlation energies for small molecules, *Molecular Physics* **103**, 763 (2005).

[2] E. Giner, D. Traore, B. Pradines, and J. Toulouse, Self-consistent density-based basis-set correction: How much do we lower total energies and improve dipole moments?, *The Journal of Chemical Physics* **155**, 044109 (2021).

[3] R. D. J. III, NIST Computational Chemistry Comparison and Benchmark Database, NIST Standard Reference Database Number 101 (2021).

[4] J. Hermann, Z. Schätzle, and F. Noé, Deep-neural-network solution of the electronic schrödinger equation, *Nature Chemistry* **12**, 891 (2020).
